# Supplementary material for: Nanopore sequencing for identification and characterization of antimicrobial-resistant Escherichia coli and Salmonella spp. from tilapia and shrimp sold at wet markets in Dhaka, Bangladesh
Source: Front Microbiol. 2024 Mar 7;15:1329620. doi: 10.3389/fmicb.2024.1329620 (PMC10956512; doi:10.3389/fmicb.2024.1329620)
Supplement: Supplementary file 2 [file Table_2.XLSX]

## Sheet: colour
Table S2 - Presence of virulence genes in E. coli isolates from fish and shrimp at retail in Bangladesh.
Isolate ID	Sample Type	Virulence genes
		AslA	astA	cia	csgA	faeA	faeA	faeC	faeC	faeD	faeE	faeF	faeF	faeH	faeI	faeI	faeJ	fdeC	fimH	fimH	gad	gad	hha	hlyE	iss	iss	lpfA	nlpI	sitA	ompT	terC	terC	tia	traT	yehA	yehB	yehC	yehD
BD08	shrimp/muscle
BD09	shrimp/muscle
BD14	shrimp/muscle
BD01	shrimp/muscle
BD03	shrimp/muscle
BD13	shrimp/muscle
BD23	shrimp/muscle
BD12	tilapia/skin
BD05	tilapia/skin
BD19	tilapia/skin
BD21	tilapia/skin
BD22	tilapia/skin
BD11	tilapia/muscle
BD17	tilapia/muscle
BD20	tilapia/muscle
