# Supplementary material for: Nanopore sequencing for identification and characterization of antimicrobial-resistant Escherichia coli and Salmonella spp. from tilapia and shrimp sold at wet markets in Dhaka, Bangladesh
Source: Front Microbiol. 2024 Mar 7;15:1329620. doi: 10.3389/fmicb.2024.1329620 (PMC10956512; doi:10.3389/fmicb.2024.1329620)
Supplement: Supplementary file 4 [file Table_4.XLSX]

## Sheet: Pairwise SNPs
Table S4 - Pairwise SNPs matrix from the Salmonella Kentucky phylogeny.
		Country	Bangladesh	Bangladesh	Bangladesh	Bangladesh	Bangladesh	Bangladesh	Pakistan	India	Bangladesh	Bangladesh	Bangladesh	Bangladesh	Bangladesh	Bangladesh	Bangladesh	Bangladesh	Bangladesh	Bangladesh	Bangladesh	Bangladesh	India	Bangladesh	India	Myanmar	Nepal	India	India	India	India	Ref
		Source	Tilapia	Tilapia	Tilapia	Tilapia	Tilapia	Human stool	Chili	Sesame seeds	Migratory bird	Migratory bird	Migratory bird	Migratory bird	Migratory bird	Migratory bird	Migratory bird	Migratory bird	Migratory bird	Migratory bird	Migratory bird	Migratory bird	Human stool	Poultry	Human stool	Human stool	Human urine	Human stool	Human stool	Human	Human stool
Country	Source	Strains	BD40	BD42	BD43	BD45	BD46	SAL_UC3259AA	SRR1522100	SRR1646515	SRR24520327	SRR24520331	SRR24520364	SRR24520366	SRR24520374	SRR24520375	SRR24520378	SRR24520380	SRR24520381	SRR24520383	SRR24520385	SRR24520386	SRR6898499	SRR6898503	SRR6898548	SRR6898549	SRR6898554	SRR6898560	SRR6898561	SRR6898562	SRR6898566
Bangladesh	Tilapia	BD40	0	4643	721	154	116	70	53	239	41	34	37	35	30	36	31	35	32	30	34	31	51	59	73	93	78	38	41	47	102	64
Bangladesh	Tilapia	BD42	4643	0	5306	4744	4709	4654	4637	4819	4634	4627	4630	4628	4623	4629	4624	4628	4625	4623	4627	4624	4635	4643	4659	4674	4662	4626	4629	4631	4686	4646
Bangladesh	Tilapia	BD43	721	5306	0	829	795	753	736	922	726	719	722	720	715	721	716	720	717	715	719	716	736	742	758	772	761	723	726	732	785	743
Bangladesh	Tilapia	BD45	154	4744	829	0	218	180	163	349	151	144	147	145	140	146	141	145	142	140	144	141	161	169	183	201	188	148	151	157	212	172
Bangladesh	Tilapia	BD46	116	4709	795	218	0	138	121	307	111	104	107	105	100	106	101	105	102	100	104	101	119	127	141	161	146	106	109	115	170	132
Bangladesh	Human stool	SAL_UC3259AA	70	4654	753	180	138	0	31	209	59	52	49	53	48	54	49	47	50	48	52	49	35	17	63	63	49	32	35	33	72	34
Pakistan	Chili	SRR1522100	53	4637	736	163	121	31	0	200	42	35	32	36	31	37	32	30	33	31	35	32	18	20	46	54	40	15	18	16	63	25
India	Sesame seeds	SRR1646515	239	4819	922	349	307	209	200	0	228	221	218	222	217	223	218	216	219	217	221	218	204	198	232	229	209	201	204	202	189	200
Bangladesh	Migratory bird	SRR24520327	41	4634	726	151	111	59	42	228	0	21	26	20	17	21	16	24	19	13	21	14	40	48	62	82	67	27	30	36	91	53
Bangladesh	Migratory bird	SRR24520331	34	4627	719	144	104	52	35	221	21	0	19	15	10	10	5	17	12	10	8	11	33	41	55	75	60	20	23	29	84	46
Bangladesh	Migratory bird	SRR24520364	37	4630	722	147	107	49	32	218	26	19	0	20	15	21	16	4	17	15	17	16	30	38	52	72	57	17	20	26	81	43
Bangladesh	Migratory bird	SRR24520366	35	4628	720	145	105	53	36	222	20	15	20	0	11	17	12	18	13	9	15	10	34	42	56	76	61	21	24	30	85	47
Bangladesh	Migratory bird	SRR24520374	30	4623	715	140	100	48	31	217	17	10	15	11	0	12	7	11	6	6	10	7	29	37	51	71	56	16	19	25	80	42
Bangladesh	Migratory bird	SRR24520375	36	4629	721	146	106	54	37	223	21	10	21	17	12	0	7	19	14	12	10	13	35	43	57	77	62	22	25	31	86	48
Bangladesh	Migratory bird	SRR24520378	31	4624	716	141	101	49	32	218	16	5	16	12	7	7	0	14	9	7	5	8	30	38	52	72	57	17	20	26	81	43
Bangladesh	Migratory bird	SRR24520380	35	4628	720	145	105	47	30	216	24	17	4	18	11	19	14	0	15	13	17	14	28	36	50	70	55	15	18	24	79	41
Bangladesh	Migratory bird	SRR24520381	32	4625	717	142	102	50	33	219	19	12	17	13	6	14	9	15	0	8	12	7	31	39	53	73	58	18	21	27	82	44
Bangladesh	Migratory bird	SRR24520383	30	4623	715	140	100	48	31	217	13	10	15	9	6	12	7	13	8	0	10	3	29	37	51	71	56	16	19	25	80	42
Bangladesh	Migratory bird	SRR24520385	34	4627	719	144	104	52	35	221	21	8	17	15	10	10	5	17	12	10	0	11	33	41	55	75	60	20	23	29	84	46
Bangladesh	Migratory bird	SRR24520386	31	4624	716	141	101	49	32	218	14	11	16	10	7	13	8	14	7	3	11	0	30	38	52	72	57	17	20	26	81	43
India	Human stool	SRR6898499	51	4635	736	161	119	35	18	204	40	33	30	34	29	35	30	28	31	29	33	30	0	24	44	58	44	13	16	14	67	29
Bangladesh	Poultry	SRR6898503	59	4643	742	169	127	17	20	198	48	41	38	42	37	43	38	36	39	37	41	38	24	0	52	52	38	21	24	22	61	23
India	Human stool	SRR6898548	73	4659	758	183	141	63	46	232	62	55	52	56	51	57	52	50	53	51	55	52	44	52	0	86	72	35	38	40	95	57
Myanmar	human stool	SRR6898549	93	4674	772	201	161	63	54	229	82	75	72	76	71	77	72	70	73	71	75	72	58	52	86	0	66	55	58	56	92	45
Nepal	Human urine	SRR6898554	78	4662	761	188	146	49	40	209	67	60	57	61	56	62	57	55	58	56	60	57	44	38	72	66	0	41	44	42	72	37
India	Human stool	SRR6898560	38	4626	723	148	106	32	15	201	27	20	17	21	16	22	17	15	18	16	20	17	13	21	35	55	41	0	3	9	64	26
India	Human stool	SRR6898561	41	4629	726	151	109	35	18	204	30	23	20	24	19	25	20	18	21	19	23	20	16	24	38	58	44	3	0	12	67	29
India	Human	SRR6898562	47	4631	732	157	115	33	16	202	36	29	26	30	25	31	26	24	27	25	29	26	14	22	40	56	42	9	12	0	65	27
India	Human stool	SRR6898566	102	4686	785	212	170	72	63	189	91	84	81	85	80	86	81	79	82	80	84	81	67	61	95	92	72	64	67	65	0	63
Ref			64	4646	743	172	132	34	25	200	53	46	43	47	42	48	43	41	44	42	46	43	29	23	57	45	37	26	29	27	63	0
